# Supplementary material for: Facile synthesis of nitrogen and sulfur co-doped carbon dots for multiple sensing capacities: alkaline fluorescence enhancement effect, temperature sensing, and selective detection of Fe3+ ions
Source: Royal Society of Chemistry journal article supplement (doi:10.1039/c8nj02086h), 2018-01-01
Supplement: c8nj02086h1.pdf [file c8nj02086h1.pdf]

**Facile synthesis of the nitrogen and sulfur co-doped carbon dots  
for multiple sensing capacities: Alkaline fluorescence  
enhancement effect, temperature sensing, and selective detection  
of Fe<sup>3+</sup> ions**

**Guannan Liu, Shan Li, Ming Cheng, Lianjing Zhao, Bo Zhang, Yuan Gao\*, Xu Yan,  
Fangmeng Liu and Geyu Lu\***

State Key Laboratory on Integrated Optoelectronics, Key Laboratory of gas sensors, Jilin Province  
and College of Electronic Science and Engineering, Jilin University, 2699 Qianjin Street,  
Changchun 130012, People's Republic of China.

\*Corresponding authors:

Yuan Gao, E-mail: [gaoyuan@jlu.edu.cn](mailto:gaoyuan@jlu.edu.cn).

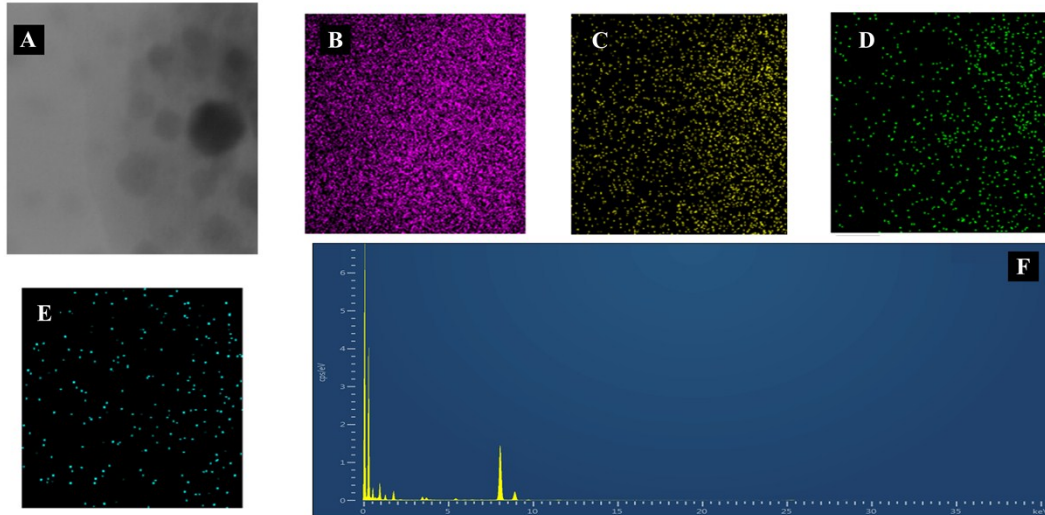

**Fig.S1.** (A) High angle annular dark field scanning transmission electron microscopy (HAADF-STEM) image and the corresponding EDAX elemental mapping of (B) carbon, (C) oxygen, (D) nitrogen, (E) sulphur and (F) EDAX spectrum.

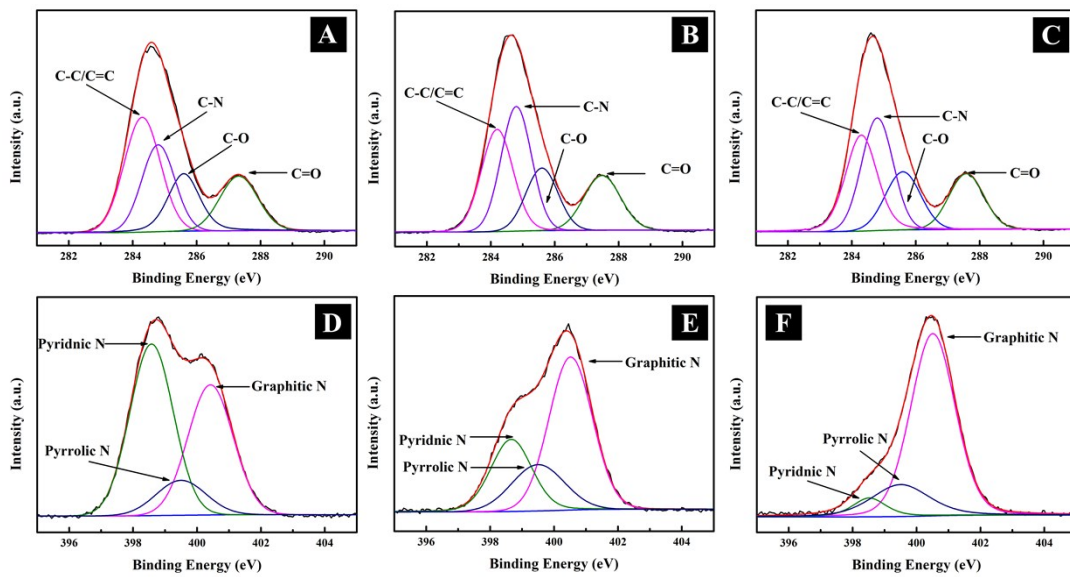

**Fig.S2.** High-resolution XPS C1s and N1s spectra of the three selected C-dots samples. (A) C1s and (D) N1s spectra of the C-dots (1:0.5); (B) C1s and (E) N1s spectra of the C-dots (1:1); (C) C1s and (E) N1s spectra of the C-dots (1:2).

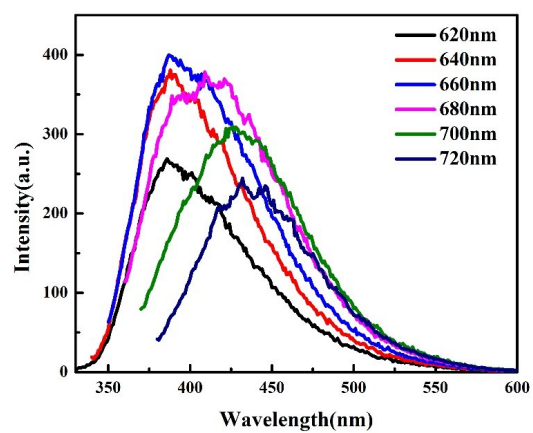

**Fig. S3.** Up-conversion emission spectra of C-dots under different excitation wavelengths.
